# Supplementary material
Source: PubMed Central journal article supplement (PMC6231157)
Supplement: jp8b08713_si_001.pdf [file jp8b08713_si_001.pdf]

## Supporting Information

### Nanoscale Investigation of Defects and Oxidation of HfSe<sub>2</sub>

*Qirong Yao<sup>†</sup>, Lijie Zhan<sup>‡</sup>, Pantelis Bampoulis<sup>†\*</sup>, and Harold J. W. Zandvliet<sup>†\*</sup>*

<sup>†</sup>Physics of Interfaces and Nanomaterials and MESA<sup>+</sup> Institute for Nanotechnology, University of Twente, P.O. Box 217, 7500AE Enschede, The Netherlands

<sup>‡</sup>School of Physics and Electronics, Hunan University, Changsha 410082, China

\*E-mail: [p.bampoulis@utwente.nl](mailto:p.bampoulis@utwente.nl) & [h.j.w.zandvliet@utwente.nl](mailto:h.j.w.zandvliet@utwente.nl)

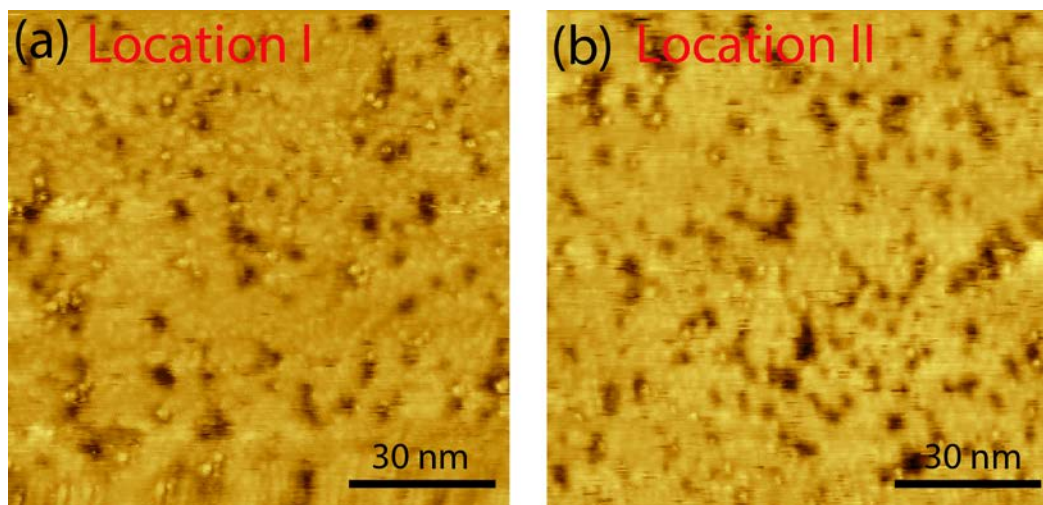

Figure S1. STM topography images of two different regions across the sample. (a) in Location I; (b) in Location II. The image size is  $100 \text{ nm} \times 100 \text{ nm}$ , sample bias voltage is  $-0.4 \text{ V}$  and tunnel current is  $0.6 \text{ nA}$ .

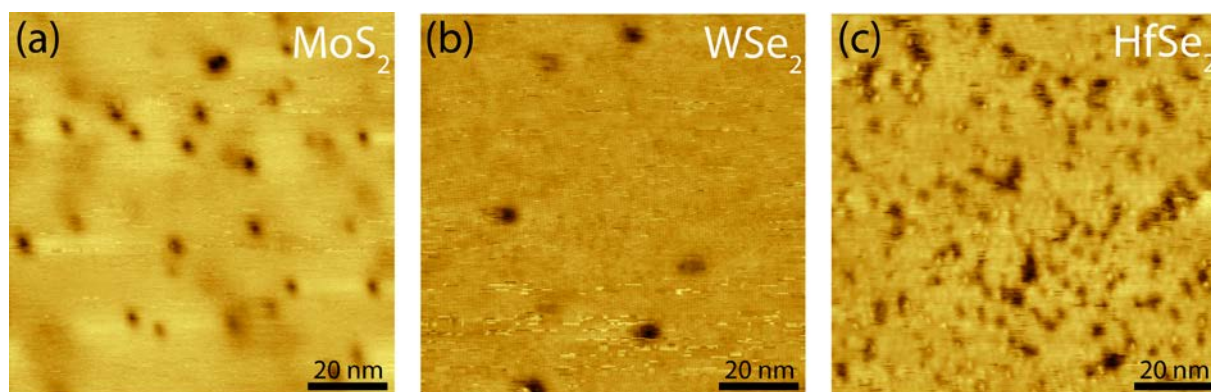

Figure S2. STM topography images of three different TMD surfaces, obtained by the same scanning tunneling microscopy settings. The image size is  $100 \text{ nm} \times 100 \text{ nm}$ , sample bias voltage is  $-0.3 \text{ V}$  and tunnel current is  $0.6 \text{ nA}$ .

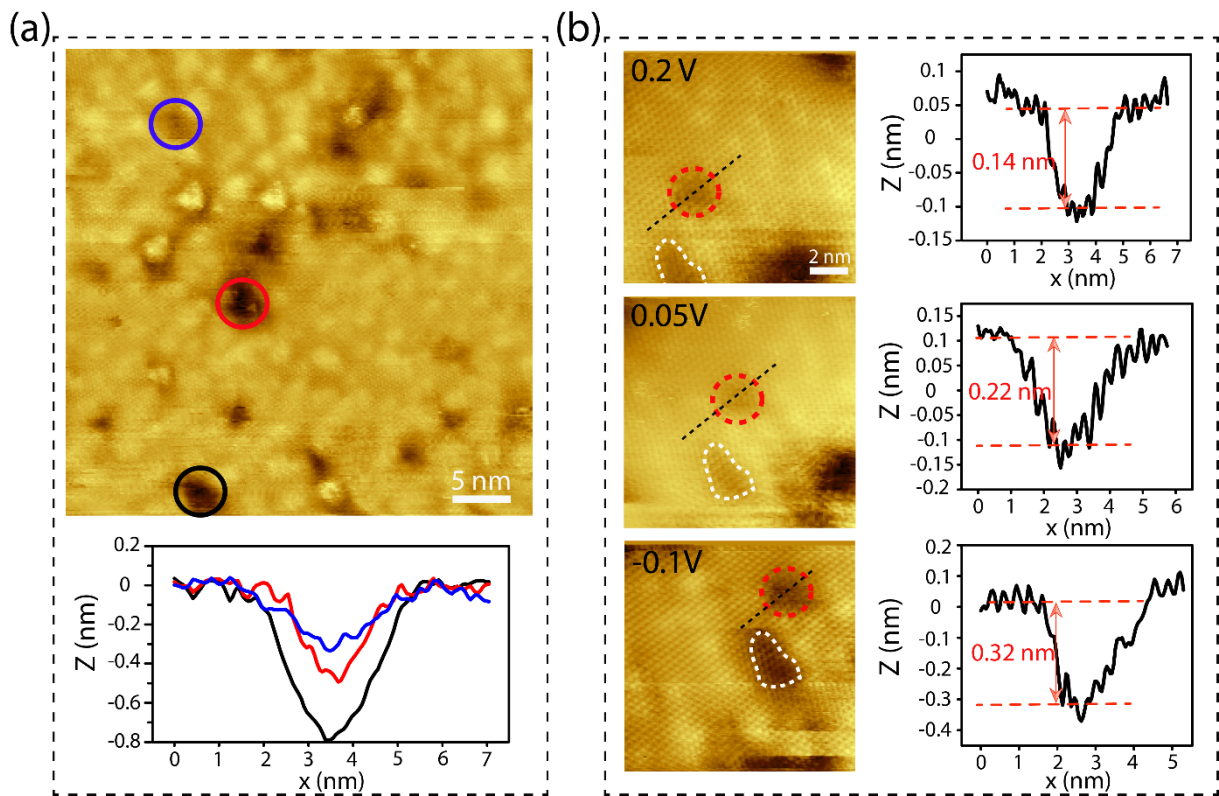

Figure S3. Height of the depression for dark defects. Panel (a): three different positions, marked by the blue, red, and black rings. The heights are 0.3, 0.5, and 0.8 nm, respectively. Panel (b): The exact height of the same dim dark defect marked by the dashed red contour, depends on the sample bias voltage.

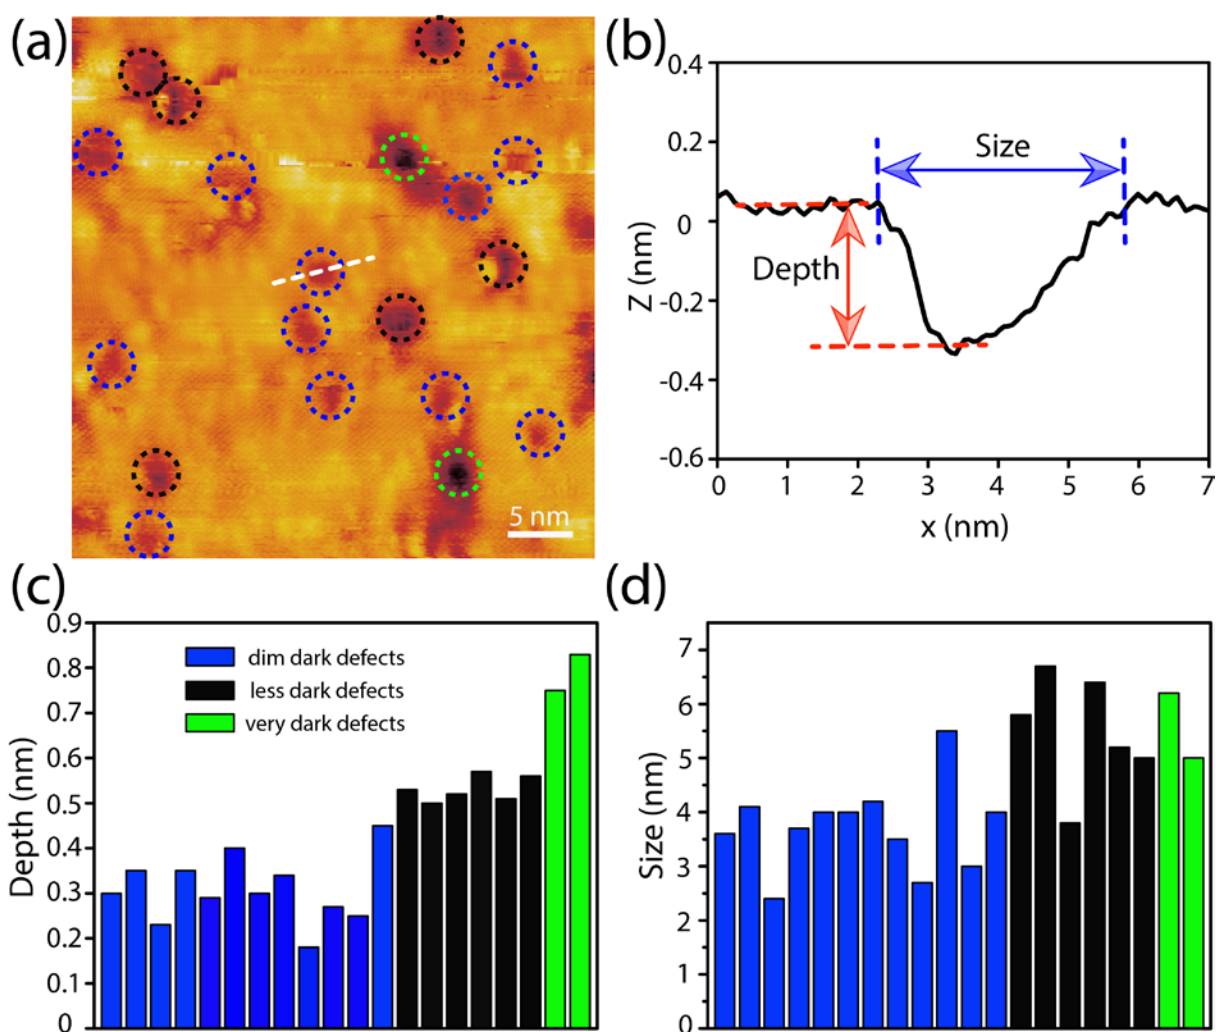

Figure S4. The three types of dark defects. (a) STM topography image of HfSe<sub>2</sub> surface, the image size is 40 nm × 40 nm, sample bias voltage is -0.4 V and tunnel current is 0.6 nA. The three types of defects, marked by the blue, black, and green contours, are corresponding to the dim dark defect, less dark defects and very dark defects, respectively; (b) The depth and size of the defect marked by the dashed white line; (c) Depth of the dark defects from (a); (d) Size of the dark defects from (a).

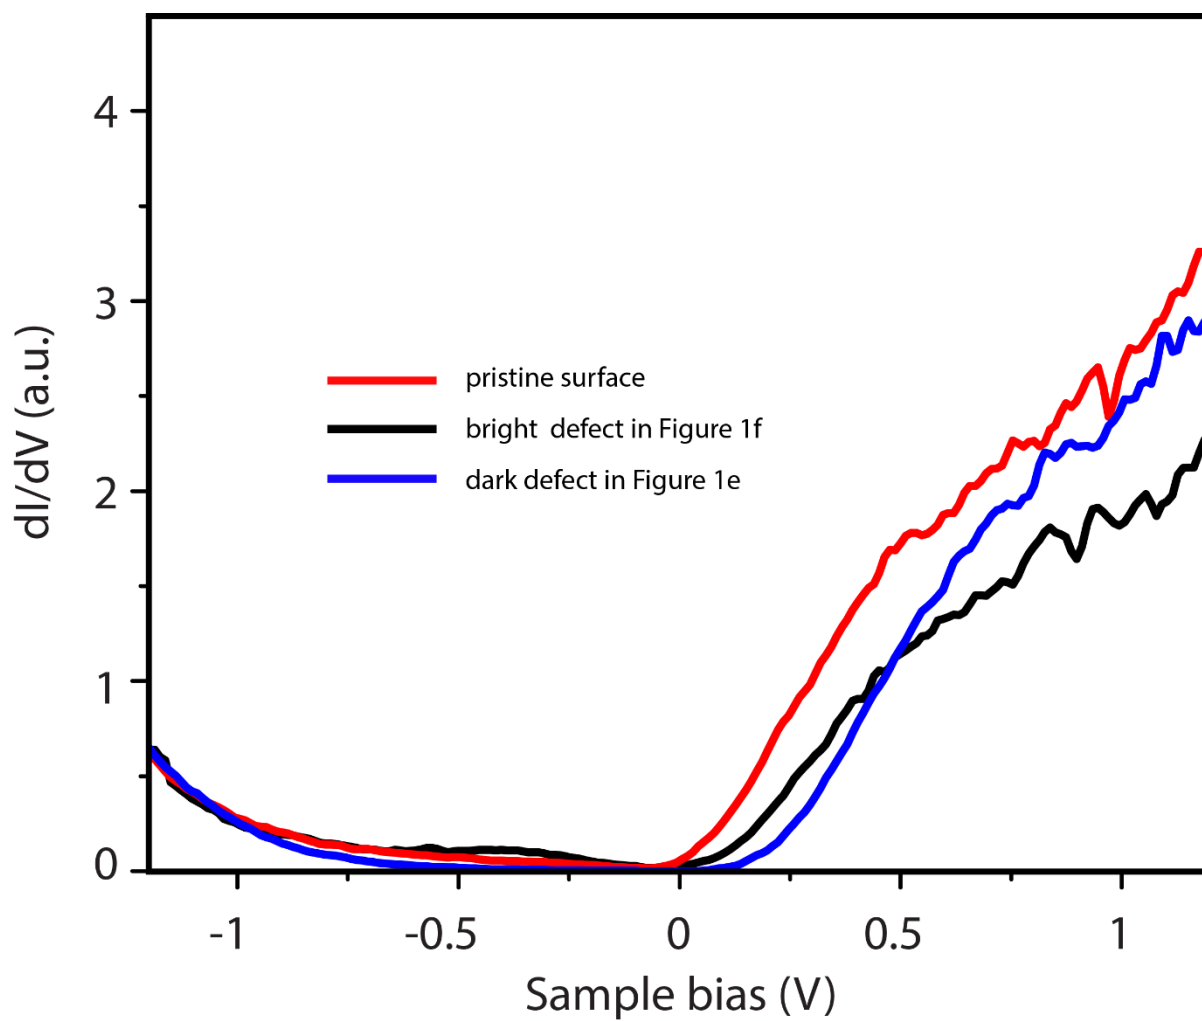

Figure S5.  $dI/dV$  spectra of the bright defect in Figure 1f, the dark defect in Figure 1e and the pristine surface.

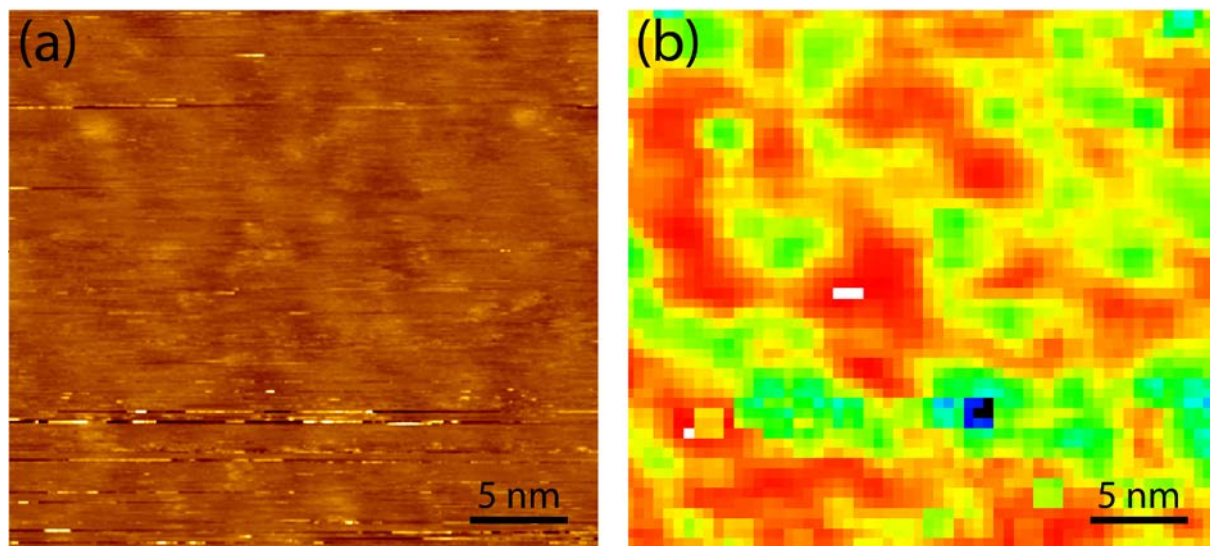

Figure S6. (a) STM topography image for the  $dI/dV$  maps shown in Figure 2b and Figure 3; (b) corresponding grid  $I-V$  map recorded simultaneously with (a), under  $V_s = -0.78$  V.
